# Supplementary material for: Selective synthesis of 5-aryl-10-(nitromethyl) substituted 15-azatripyrrane, 15-oxatripyrrane and 15-thiatripyrrane: access to nitromethyl functionalized A3B-porphyrins
Source: Royal Society of Chemistry journal article supplement (doi:10.1039/c8nj01798k), 2018-01-01
Supplement: c8nj01798k1.pdf [file c8nj01798k1.pdf]

## SUPPORTING INFORMATION

### Selective Synthesis of 5-Aryl-10-(Nitromethyl) Substituted 15-azatripyrrane, 15-oxatripyrrane, 15-thiatripyrrane: An Access to Nitromethyl Functionalized A<sub>3</sub>B-Porphyrins

Pinar Seyitdanlioglu,<sup>a</sup> Gulberil Altundal, Seda Cinar,<sup>a</sup> Canan Unaleroglu\*

Hacettepe University, Chemistry Department, 06800, Beytepe, Ankara, Turkey

---

*Hacettepe University, Department of Chemistry, 06800 Beytepe, Turkey.*

*E-mail: canan@hacettepe.edu.tr*

*<sup>a</sup>These authors contributed equally.*

#### Table of contents

|                                                                                           |    |
|-------------------------------------------------------------------------------------------|----|
| 1. Table S1. Optimization of the reaction conditions for the formation of <b>5g</b> ..... | 2  |
| 2. NMR Spectra of compounds <b>5a-l</b> and <b>6a-e</b> .....                             | 3  |
| 3. NMR Spectra and Uv-visible spectra of compounds <b>7a-d</b> .....                      | 18 |

1. Table S1. Optimization of the reaction conditions for the formation of 5g

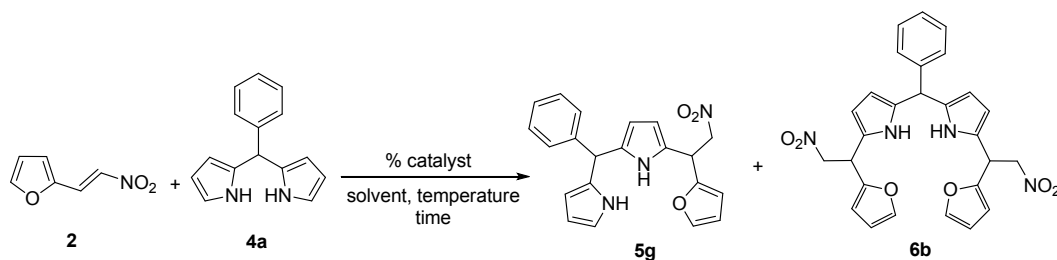

| Entry    | Catalyst (mol %)        | Mole ratio (2:4a) | Solvent                         | Time (h)  | Yield (%) <sup>a</sup> |          |
|----------|-------------------------|-------------------|---------------------------------|-----------|------------------------|----------|
|          |                         |                   |                                 |           | 5g                     | 6b       |
| 1        | I <sub>2</sub> (10)     | 1:4               | Ether                           | 24        | 50                     | 3        |
| 2        | I <sub>2</sub> (10)     | 1:6               | Ether                           | 24        | 63                     | -        |
| 3        | I <sub>2</sub> (10)     | 1:6               | Ether                           | 48        | 80                     | 8        |
| <b>4</b> | <b>I<sub>2</sub>(5)</b> | <b>1:6</b>        | <b>Ether</b>                    | <b>48</b> | <b>82</b>              | <b>3</b> |
| 5        | I <sub>2</sub> (20)     | 1:6               | Ether                           | 48        | 31                     | 7        |
| 6        | CAN (5)                 | 1:6               | Ether                           | 48        | 77                     | trace    |
| 7        | TsOH (5)                | 1:6               | Ether                           | 48        | 80                     | 7        |
| 8        | KHSO <sub>4</sub> (5)   | 1:6               | Ether                           | 48        | 79                     | 5        |
| 9        | no cat.                 | 1:6               | Ether                           | 48        | 68                     | 2        |
| 10       | InCl <sub>3</sub> (5)   | 16                | Ether                           | 48        | 69                     | 4        |
| 11       | I <sub>2</sub> (5)      | 1:6               | Ethanol                         | 48        | 58                     | 5        |
| 12       | I <sub>2</sub> (5)      | 1:6               | CH <sub>2</sub> Cl <sub>2</sub> | 48        | 29                     | 5        |
| 13       | I <sub>2</sub> (5)      | 1:6               | THF                             | 48        | 61                     | 3        |
| 14       | I <sub>2</sub> (5)      | 1:6               | H <sub>2</sub> O                | 48        | 25                     | 26       |

## 2. NMR Spectra of compounds 5a-l and 6a-e

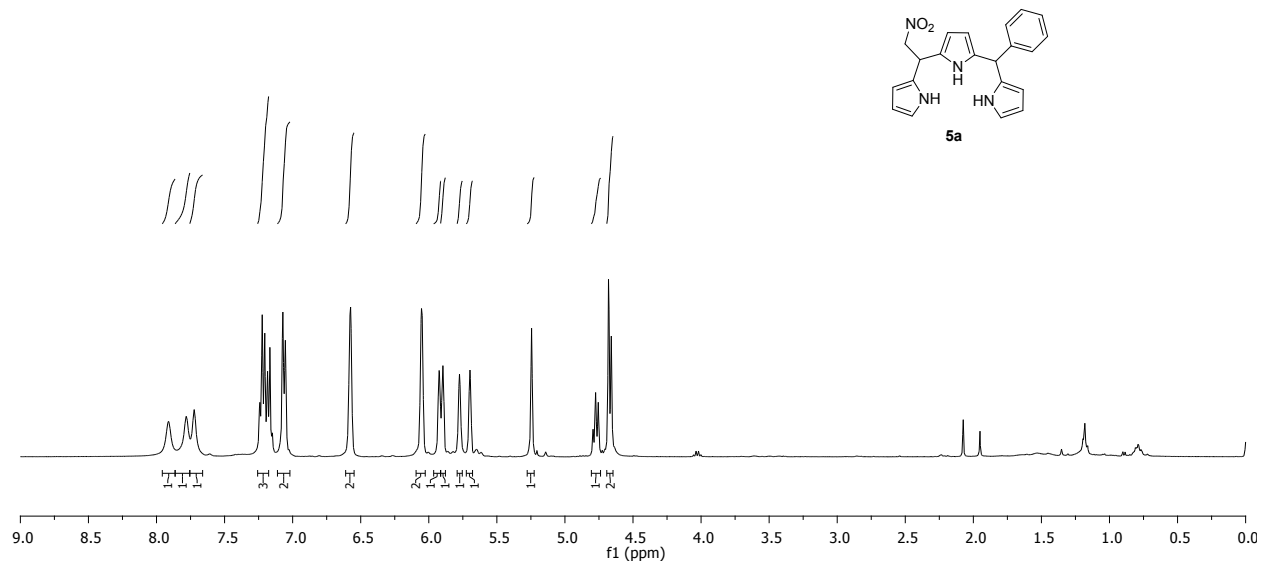

Figure S1. <sup>1</sup>H NMR spectrum of **5a** (Solvent: CDCl<sub>3</sub>)

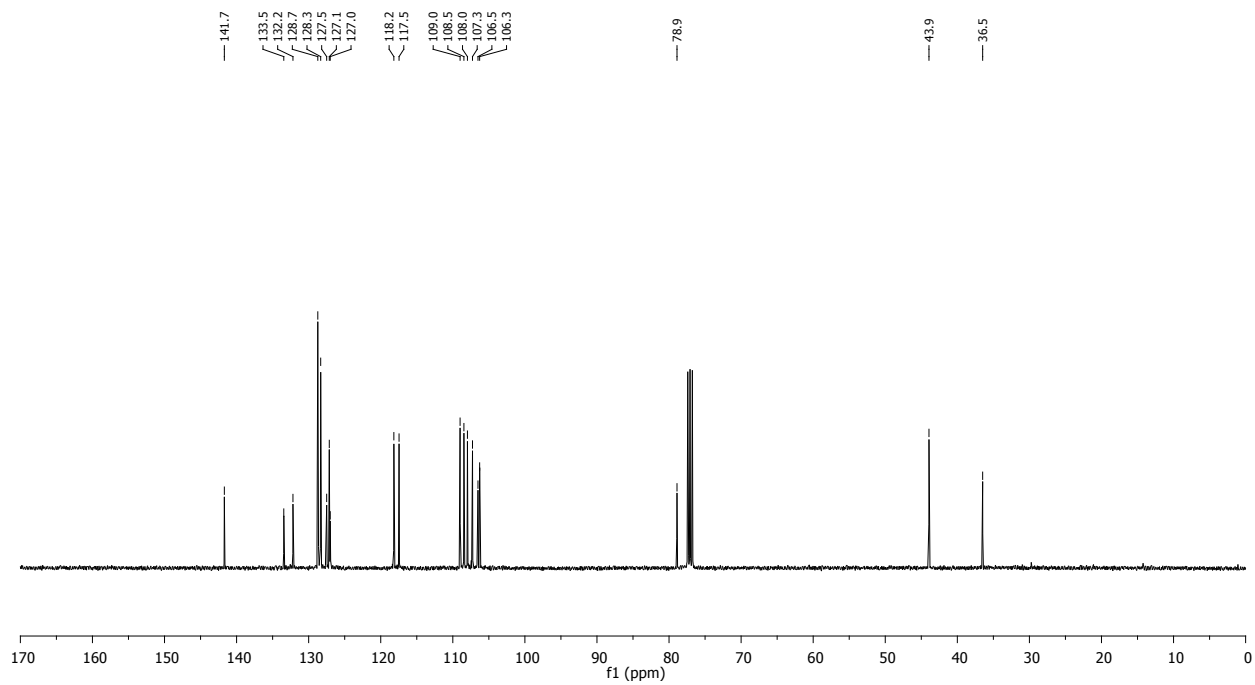

Figure S2. <sup>13</sup>C NMR spectrum of **5a** (Solvent: CDCl<sub>3</sub>)

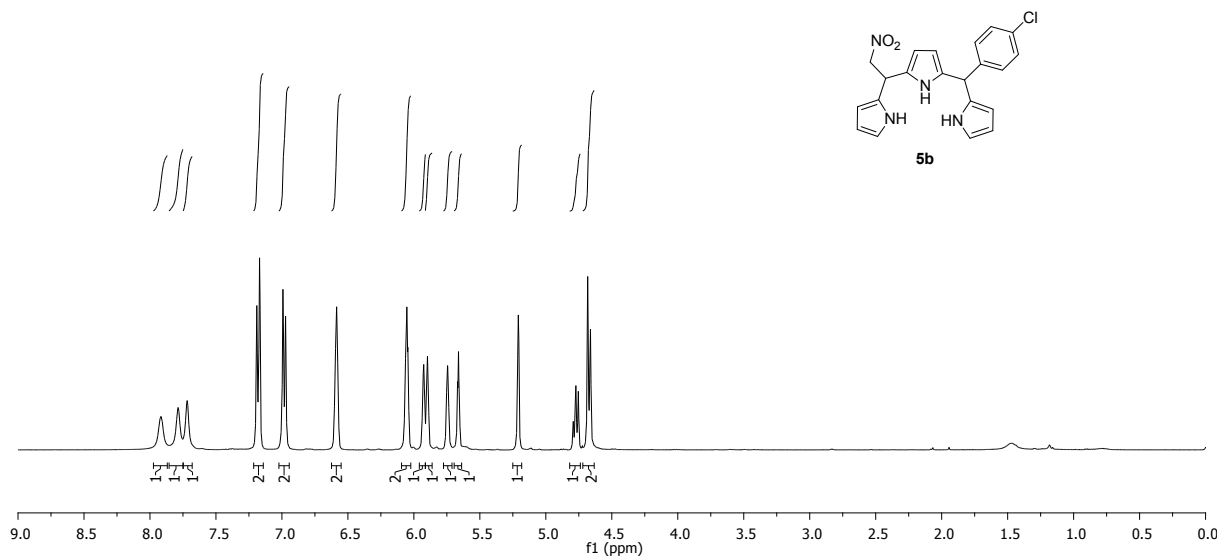

Figure S3. <sup>1</sup>H NMR spectrum of **5b** (Solvent: CDCl<sub>3</sub>)

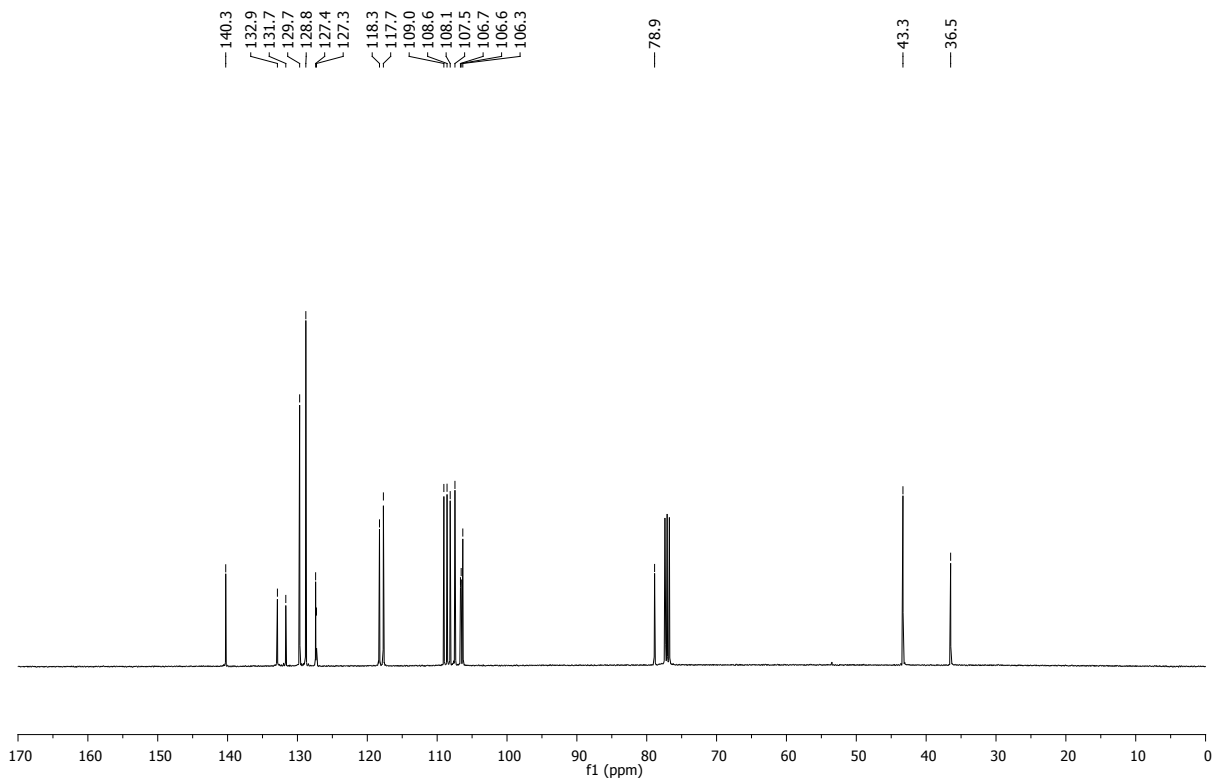

Figure S4. <sup>13</sup>C NMR spectrum of **5b** (Solvent: CDCl<sub>3</sub>)

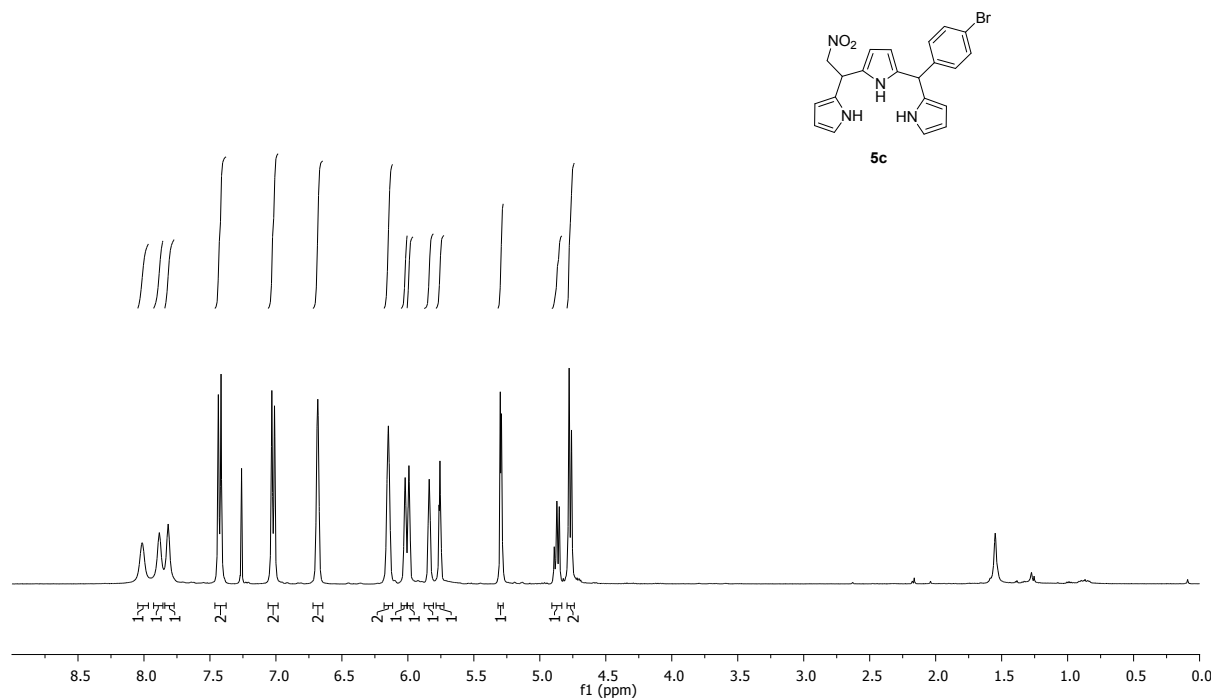

Figure S5. <sup>1</sup>H NMR spectrum of **5c** (Solvent: CDCl<sub>3</sub>)

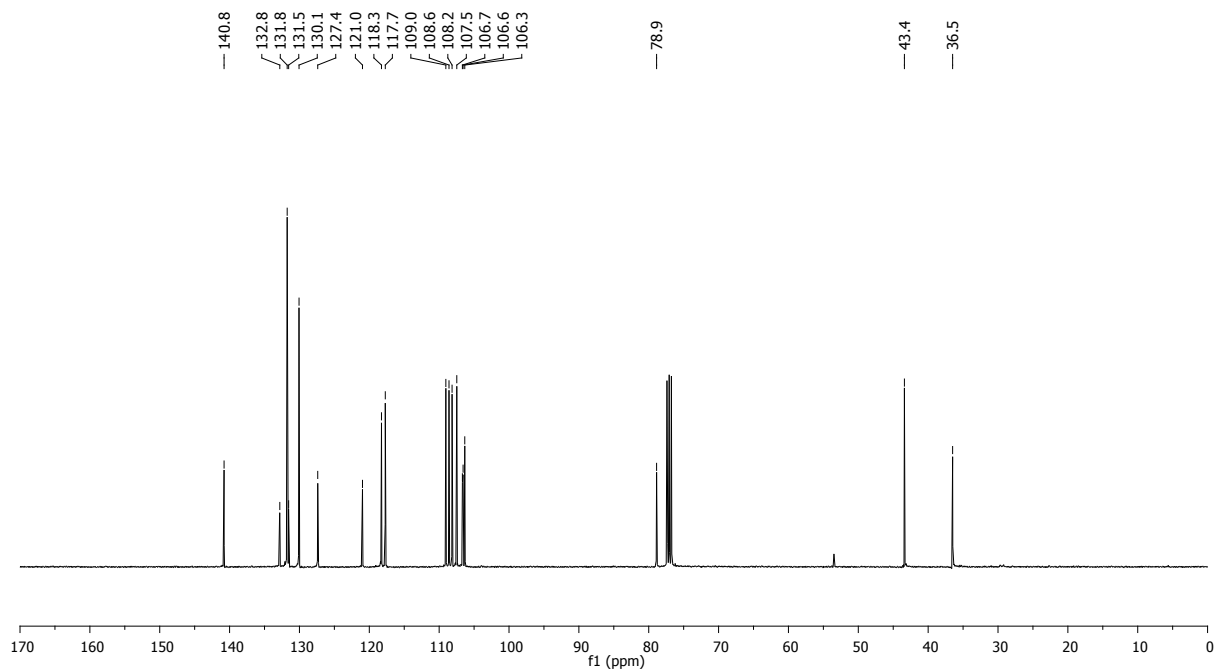

Figure S6. <sup>13</sup>C NMR spectrum of **5c** (Solvent: CDCl<sub>3</sub>)

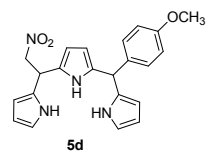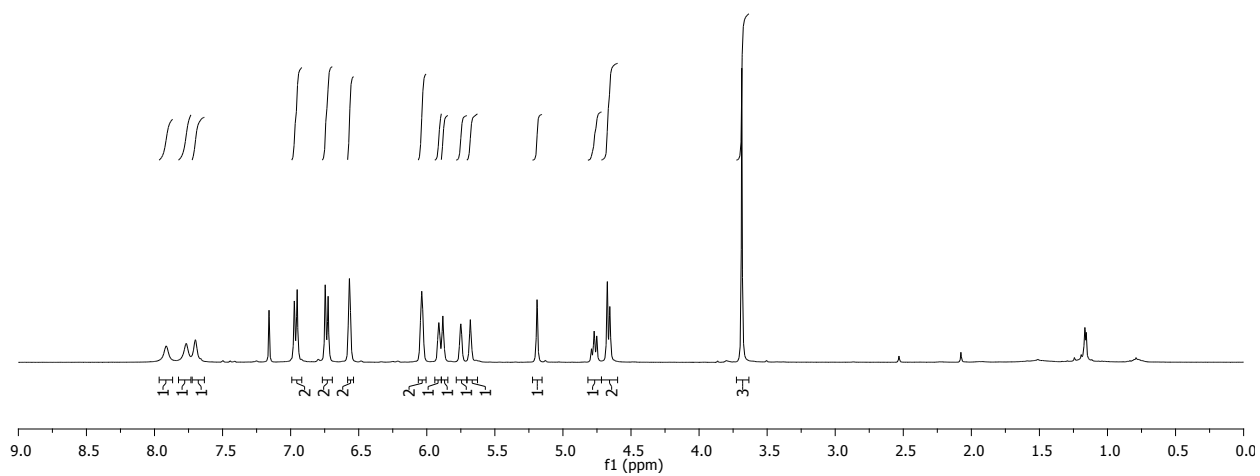

Figure S7. <sup>1</sup>H NMR spectrum of **5d** (Solvent: CDCl<sub>3</sub>)

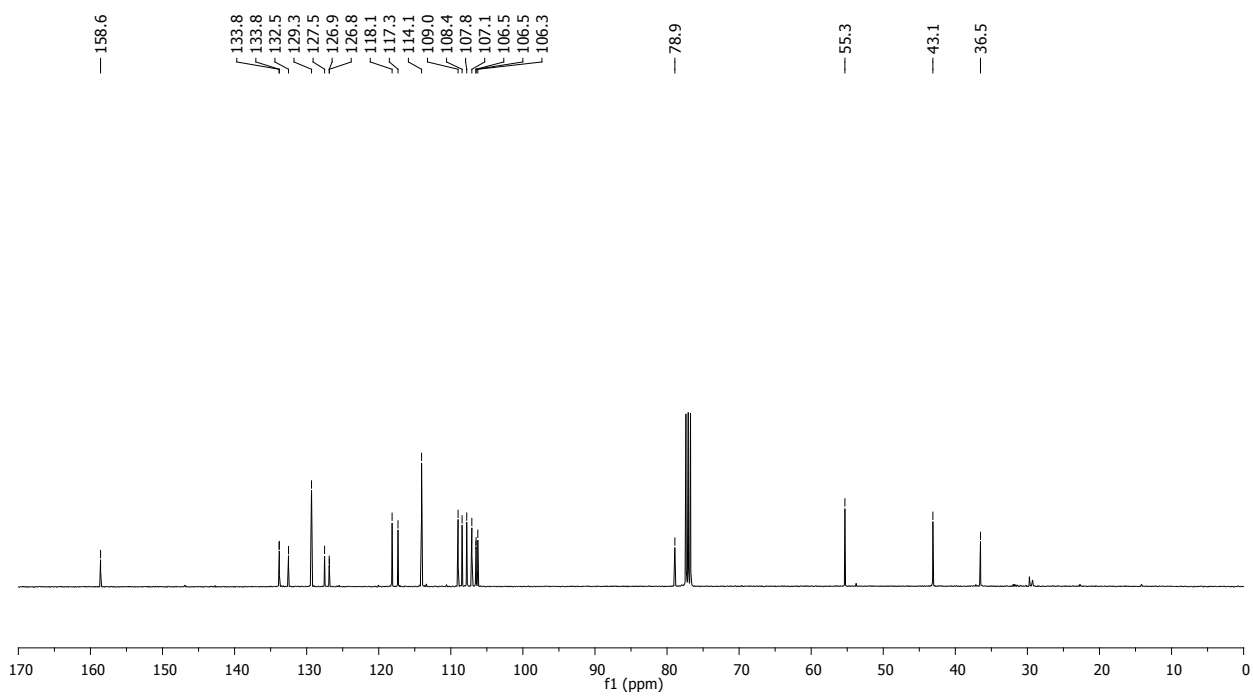

Figure S8. <sup>13</sup>C NMR spectrum of **5d** (Solvent: CDCl<sub>3</sub>)

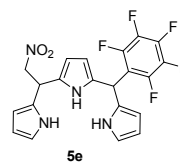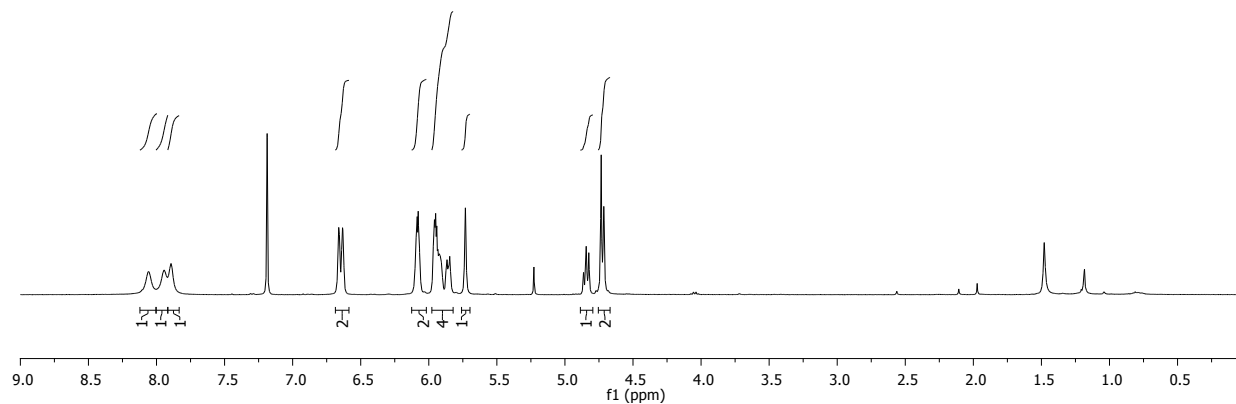

Figure S9. <sup>1</sup>H NMR spectrum of **5e** (Solvent: CDCl<sub>3</sub>)

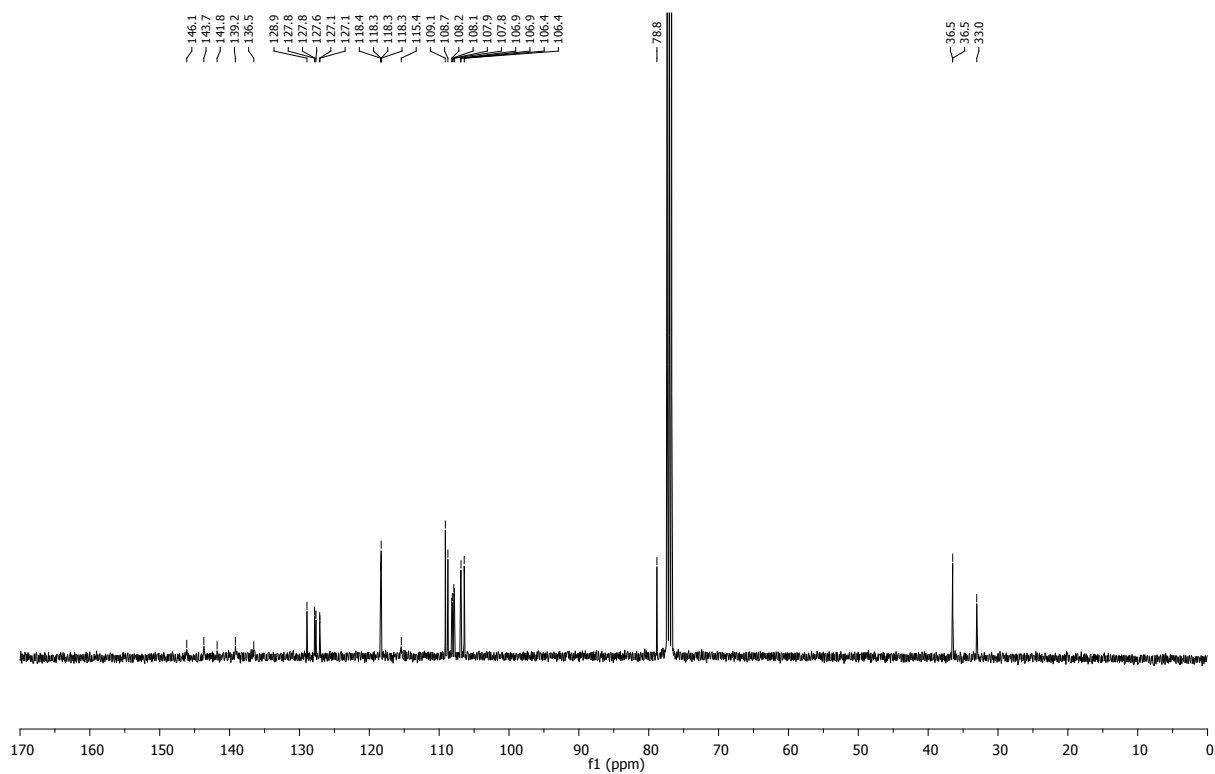

Figure S10. <sup>13</sup>C NMR spectrum of **5e** (Solvent: CDCl<sub>3</sub>)

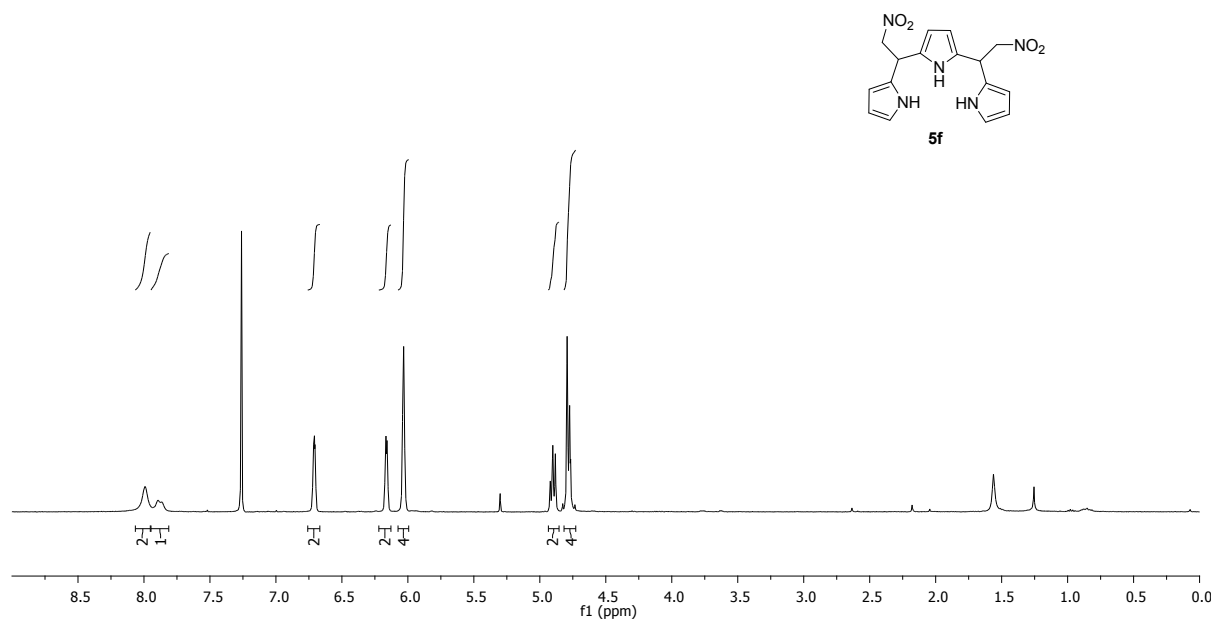

Figure S11.  $^1\text{H}$  NMR spectrum of **5f** (Solvent:  $\text{CDCl}_3$ )

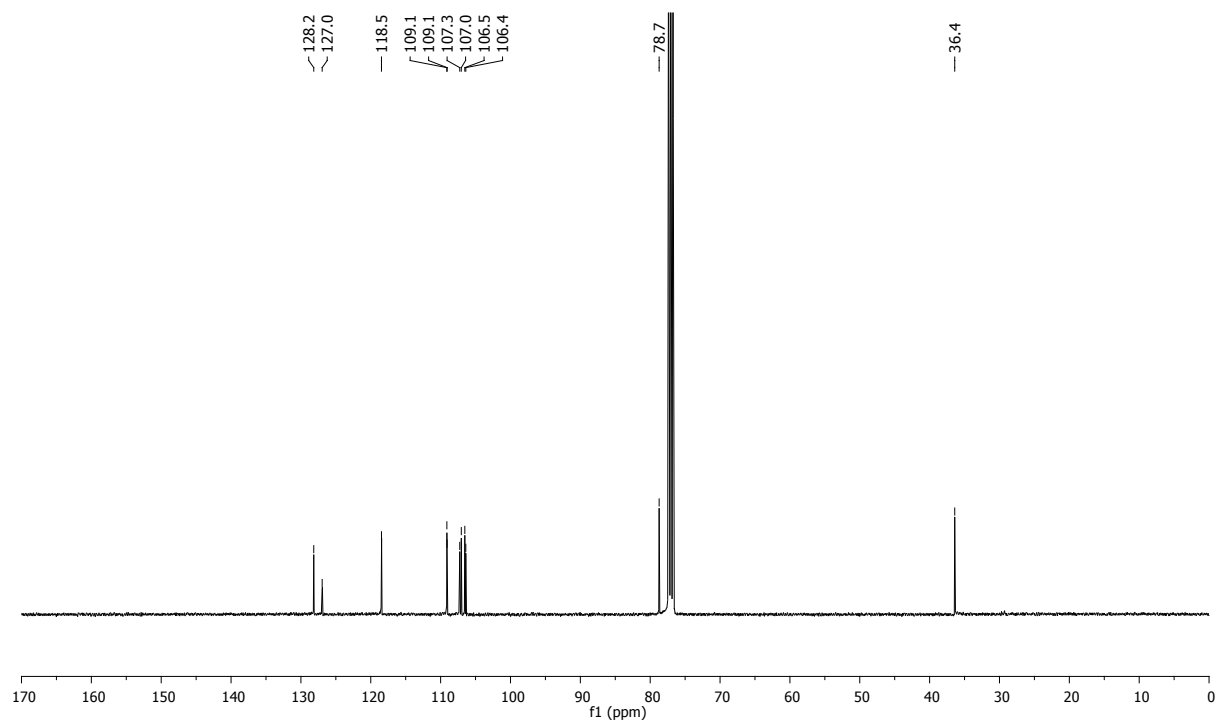

Figure S12.  $^{13}\text{C}$  NMR spectrum of **5f** (Solvent:  $\text{CDCl}_3$ )



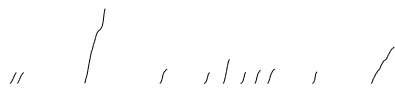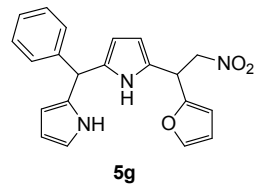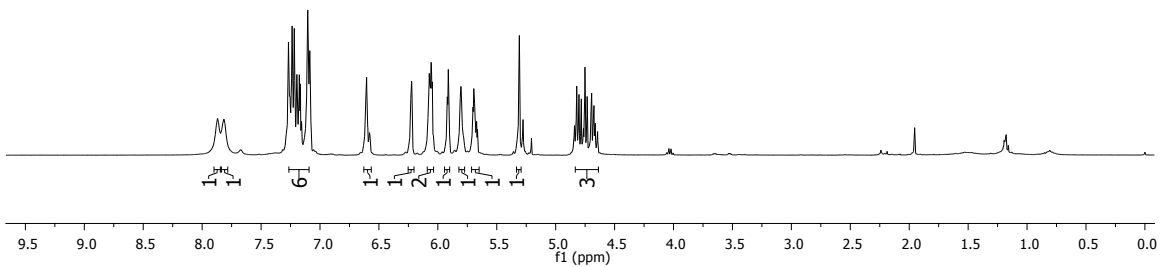

Figure S13. <sup>1</sup>H NMR spectrum of **5g** (Solvent: CDCl<sub>3</sub>)

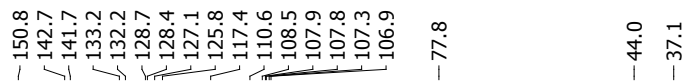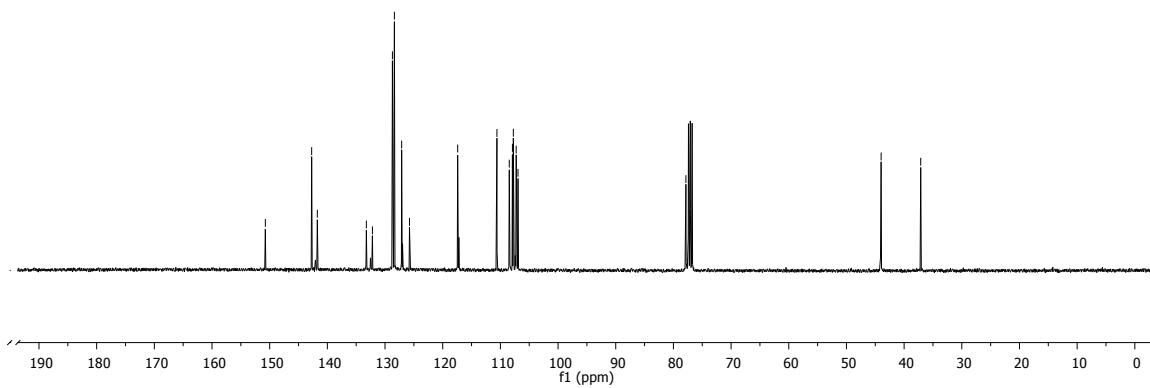

Figure S14. <sup>13</sup>C NMR spectrum of **5g** (Solvent: CDCl<sub>3</sub>)

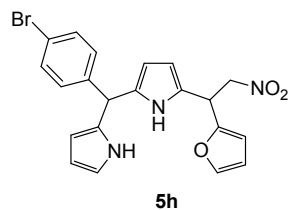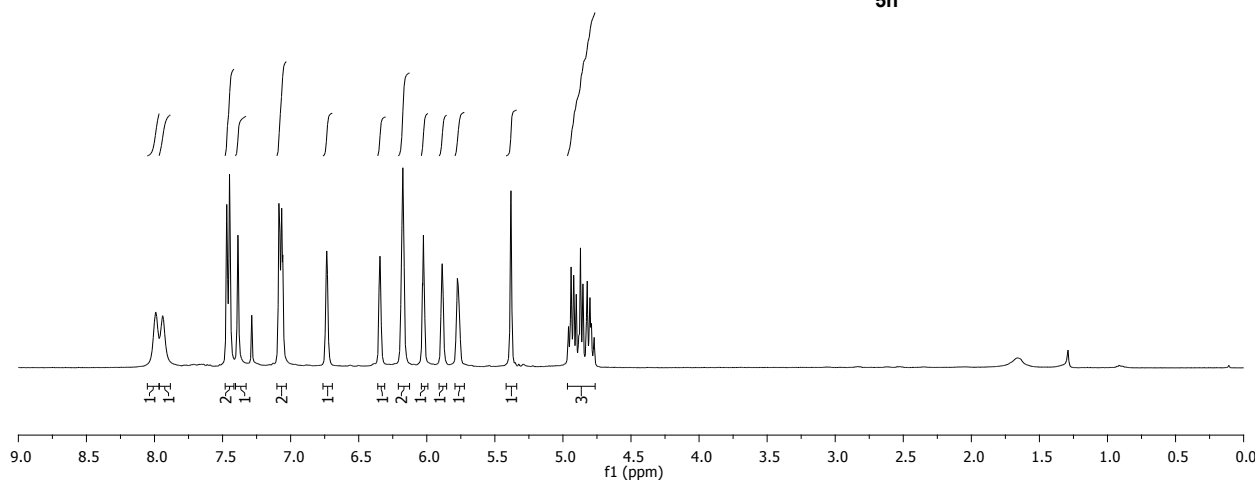

Figure S15. <sup>1</sup>H NMR spectrum of **5h** (Solvent: CDCl<sub>3</sub>)

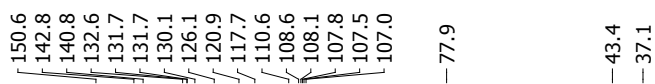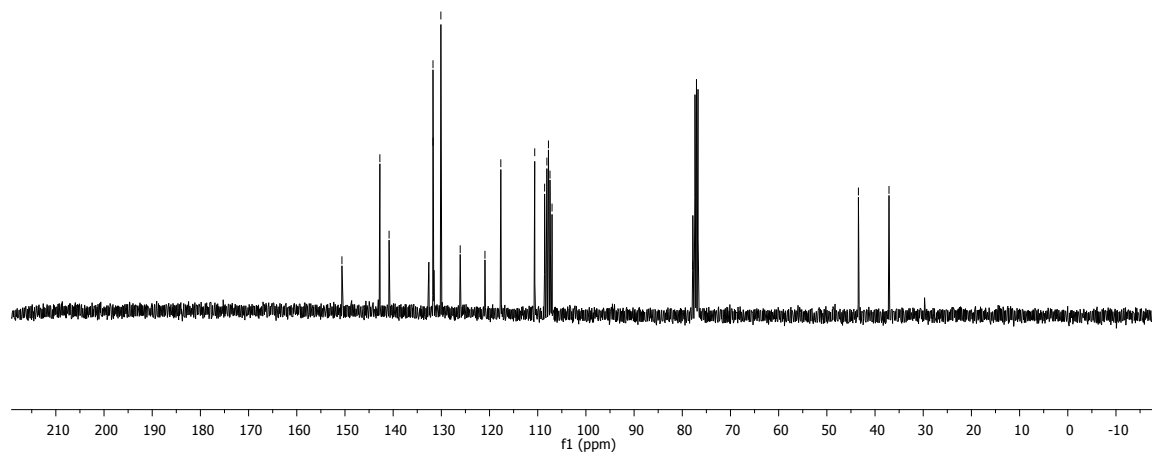

Figure S16. <sup>13</sup>C NMR spectrum of **5h** (Solvent: CDCl<sub>3</sub>)

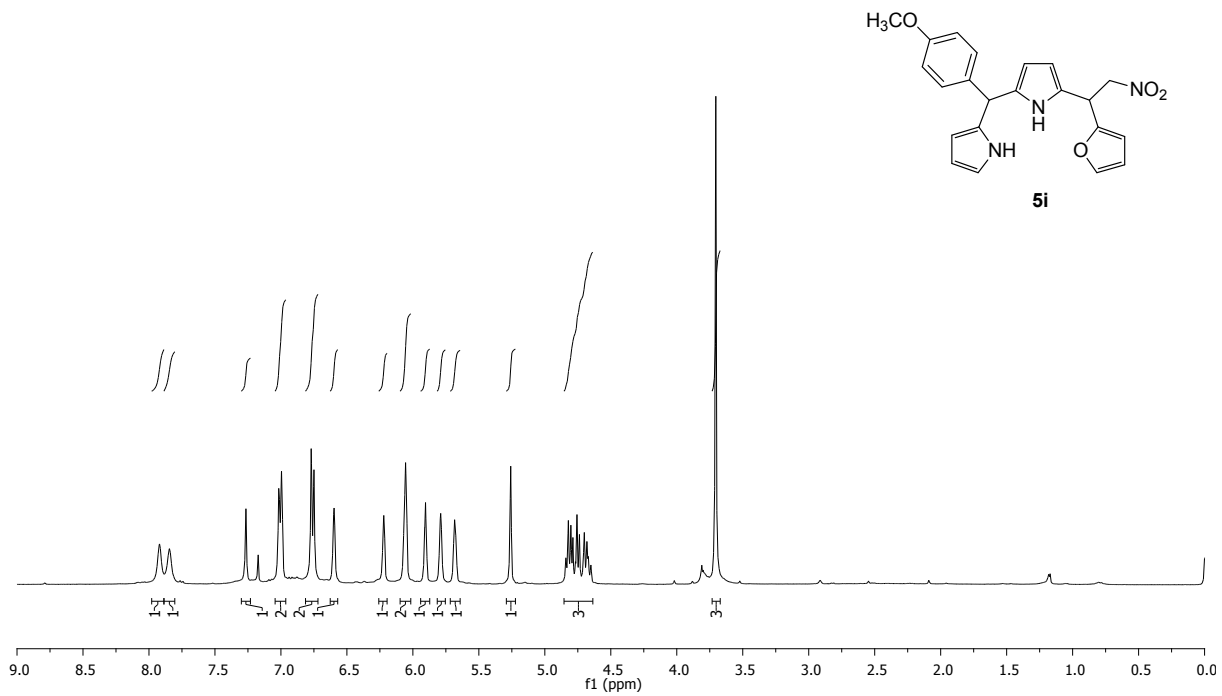

Figure S17. <sup>1</sup>H NMR spectrum of **5i** (Solvent: CDCl<sub>3</sub>)

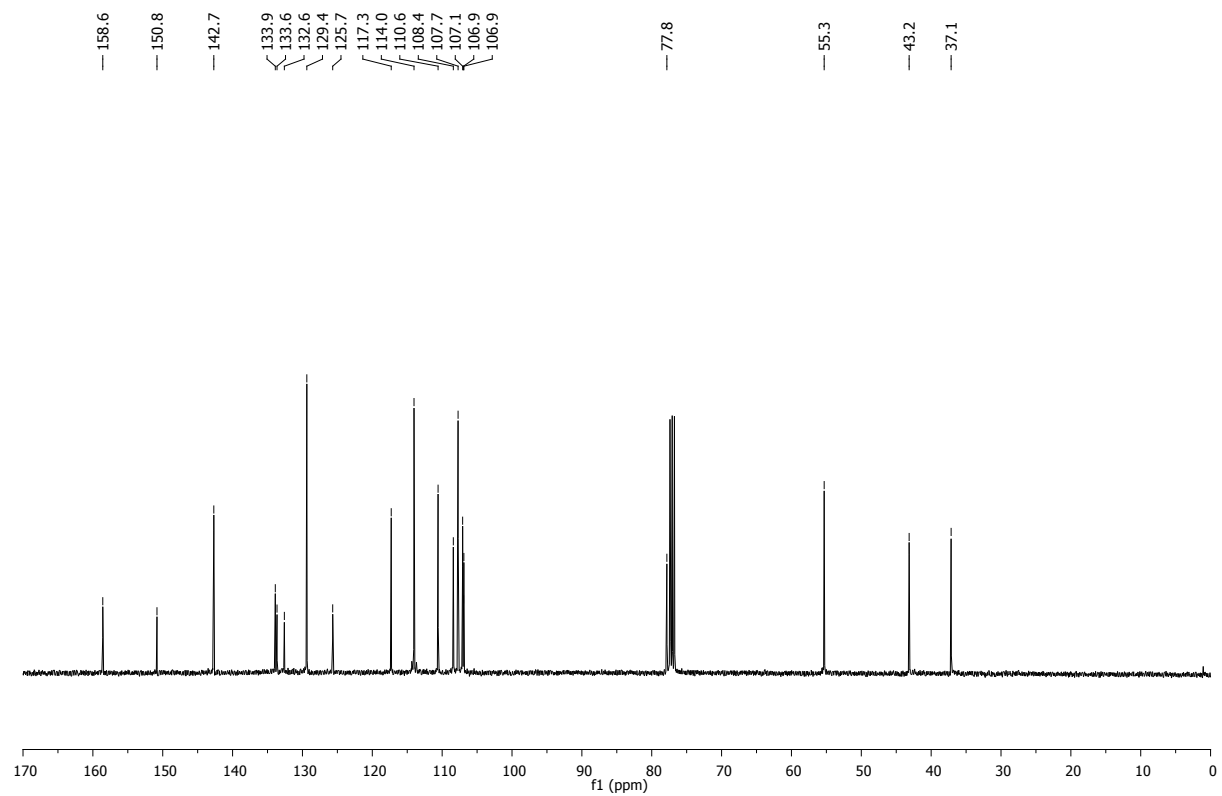

Figure S18. <sup>13</sup>C NMR spectrum of **5i** (Solvent: CDCl<sub>3</sub>)

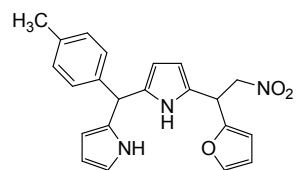

**5j**

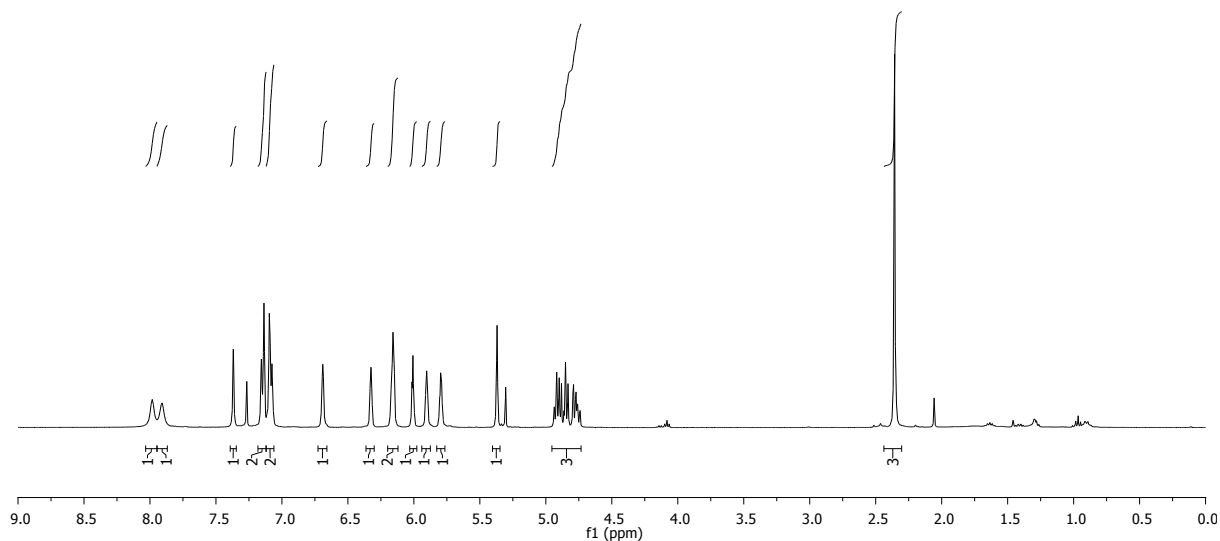

Figure S19. <sup>1</sup>H NMR spectrum of **5j** (Solvent: CDCl<sub>3</sub>)

150.8  
 142.7  
 138.8  
 136.7  
 133.5  
 132.4  
 129.4  
 128.3  
 125.7  
 117.3  
 110.6  
 108.4  
 107.8  
 107.7  
 107.1  
 106.9  
 77.8  
 43.6  
 37.1  
 21.1

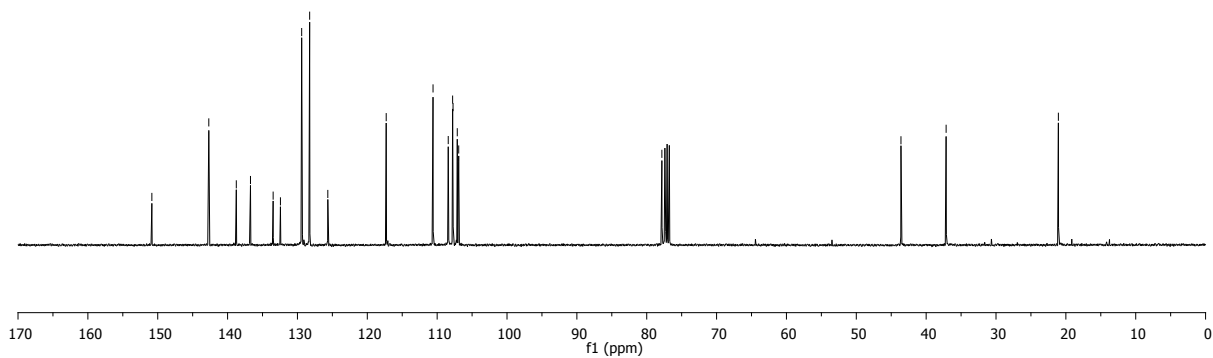

Figure S20. <sup>13</sup>C NMR spectrum of **5j** (Solvent: CDCl<sub>3</sub>)

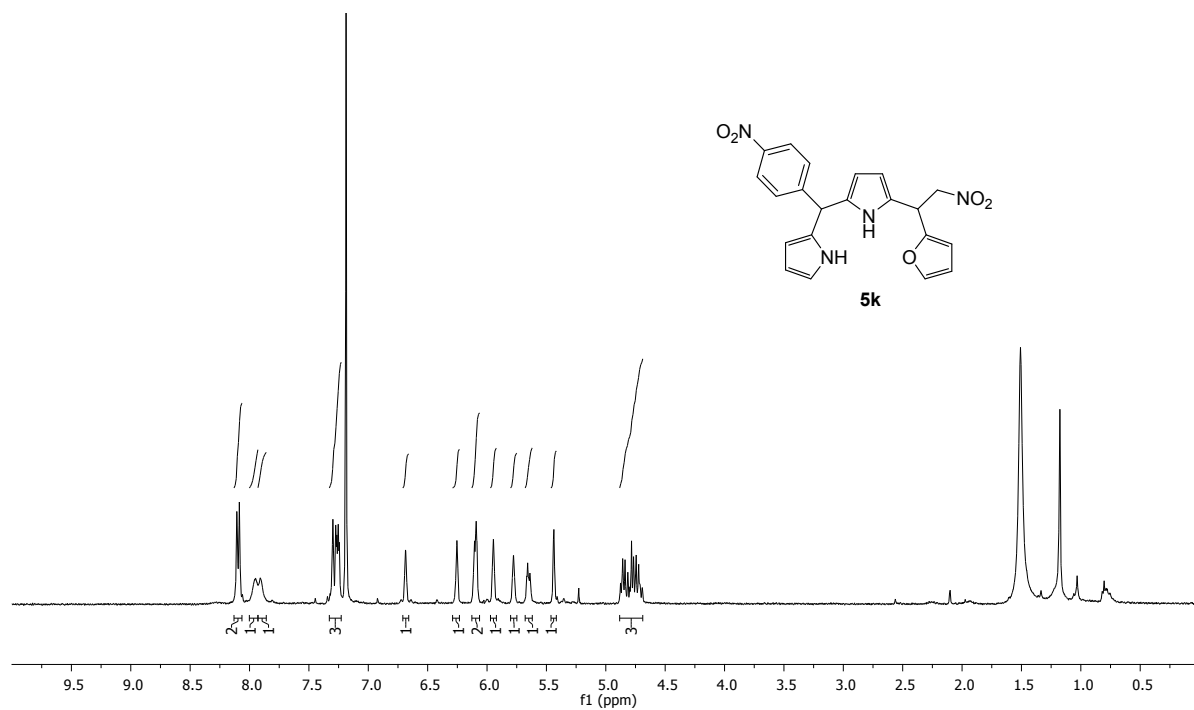

Figure S21. <sup>1</sup>H NMR spectrum of **5k** (Solvent: CDCl<sub>3</sub>)

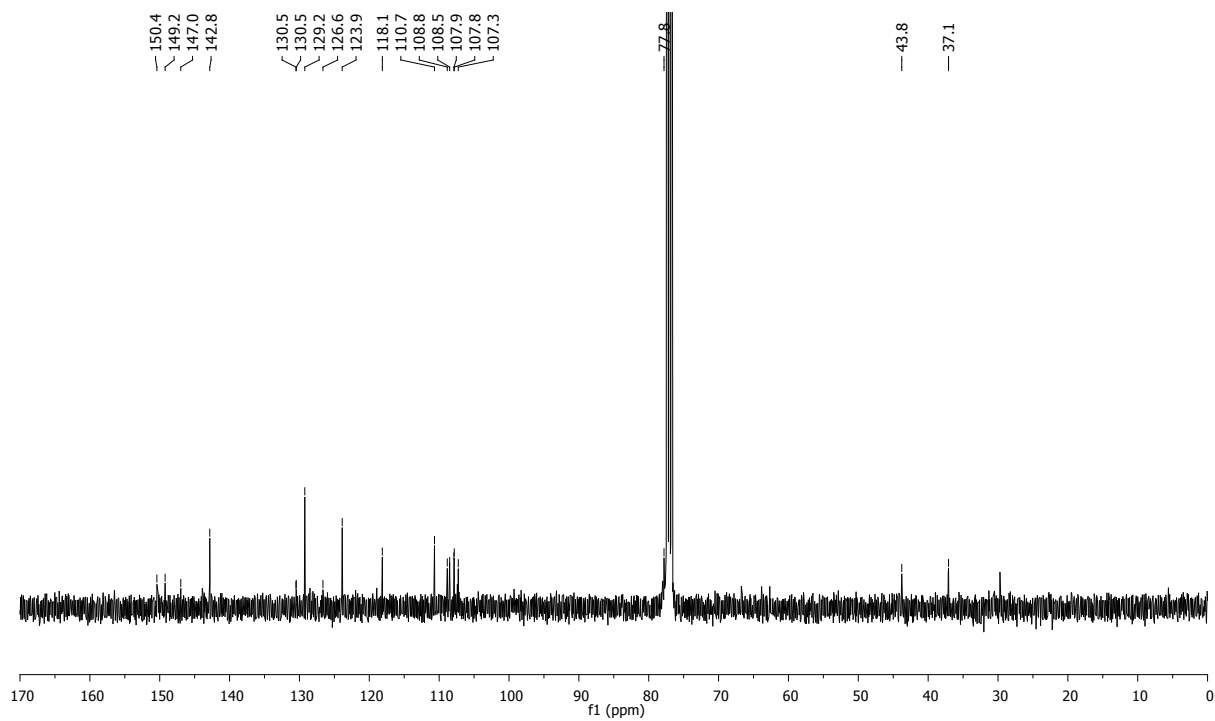

Figure S22. <sup>13</sup>C NMR spectrum of **5k** (Solvent: CDCl<sub>3</sub>)

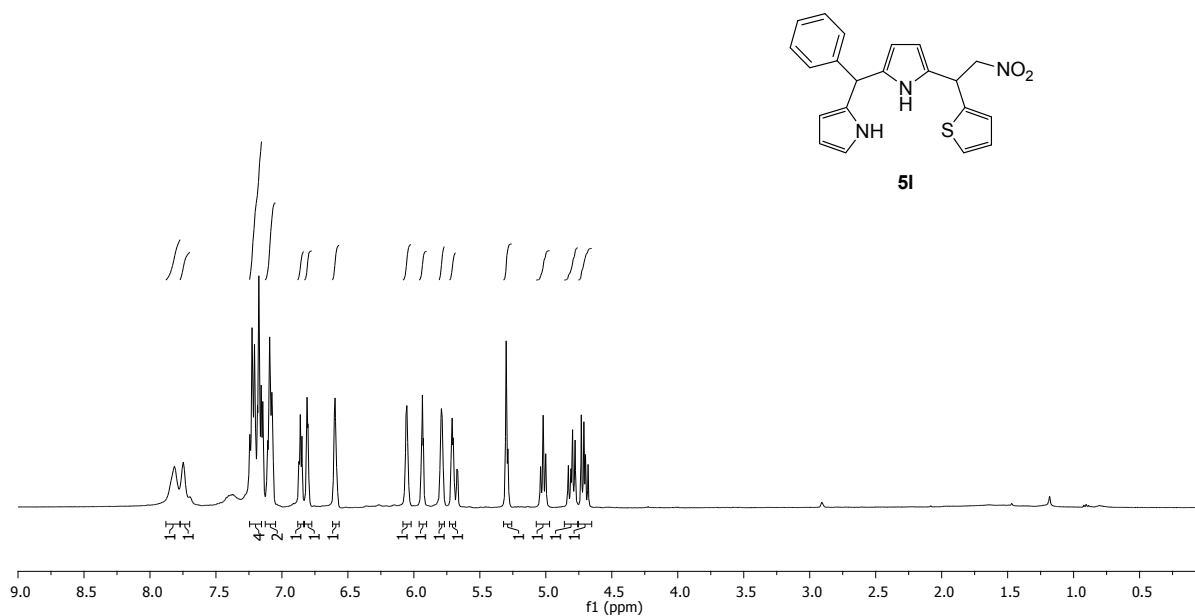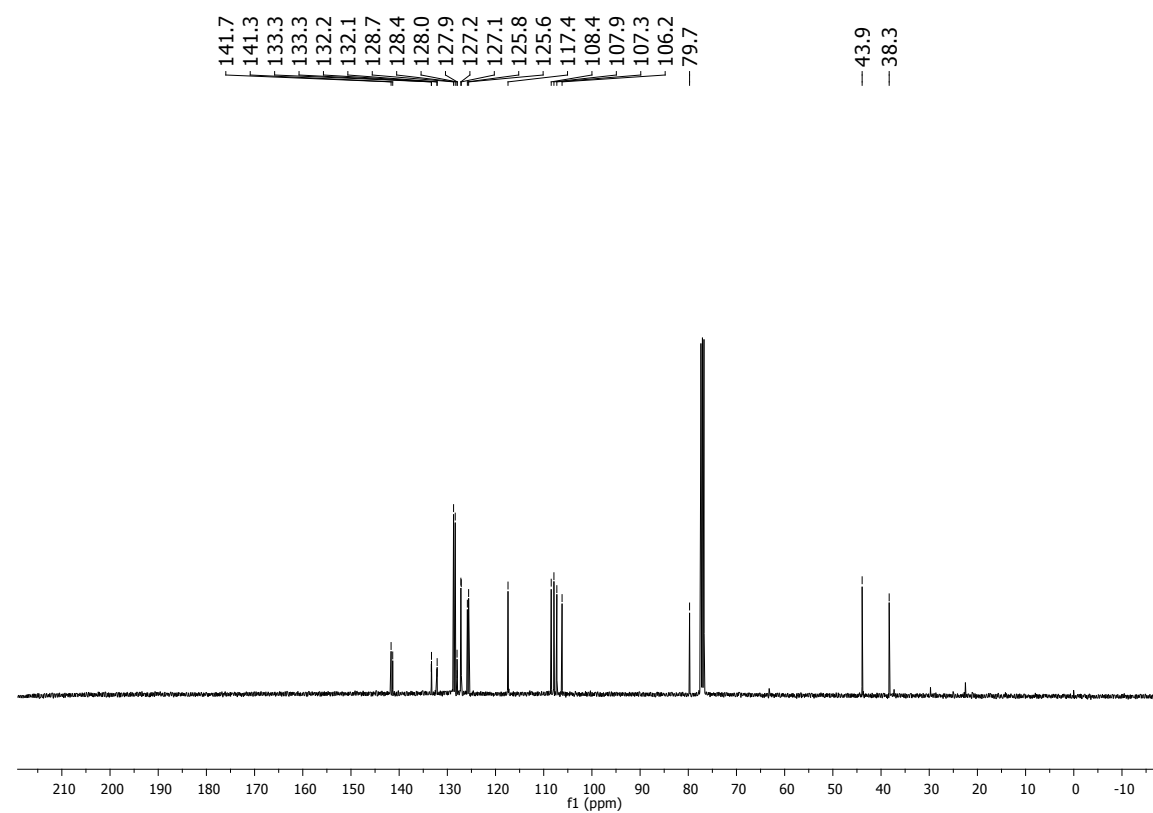

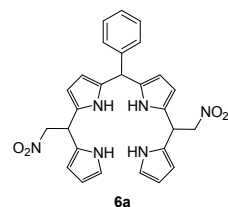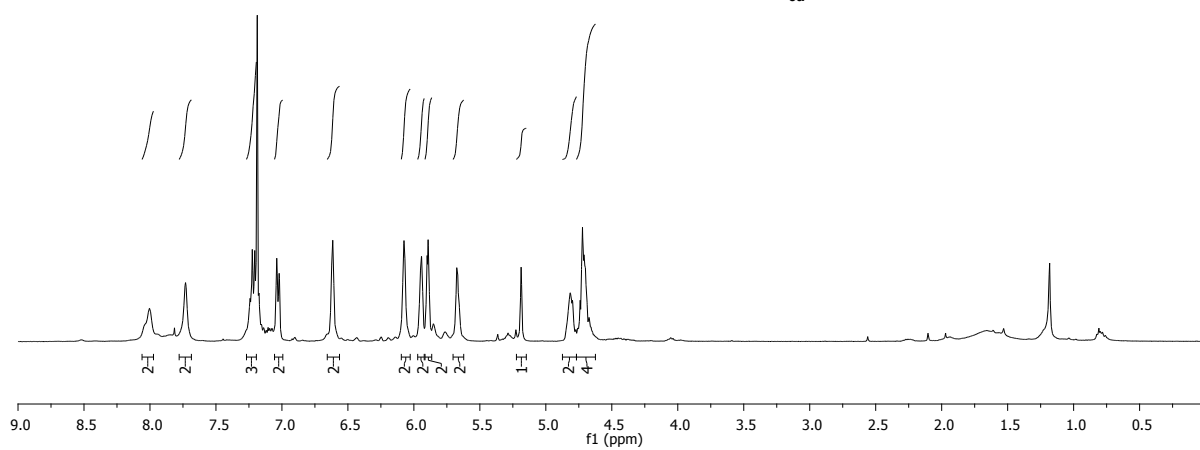

Figure S25.  $^1\text{H}$  NMR spectrum of **6a** (Solvent:  $\text{CDCl}_3$ )

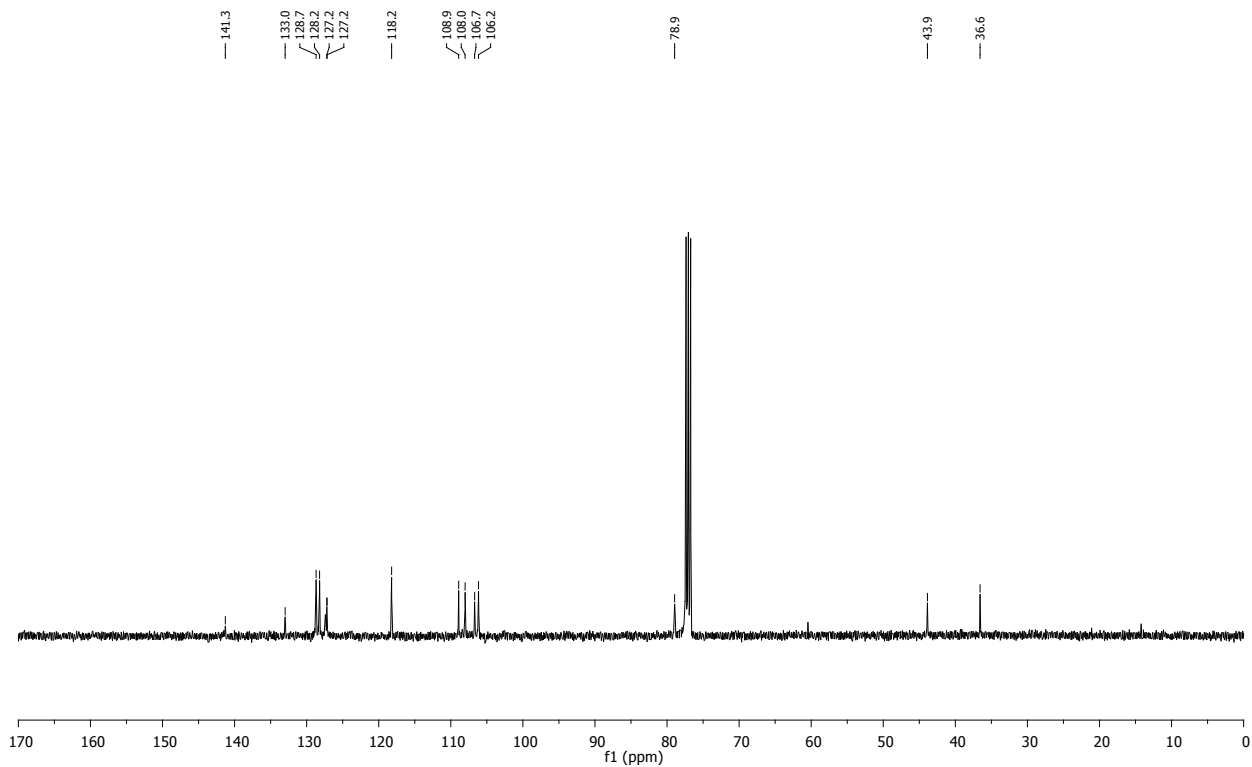

Figure S26.  $^{13}\text{C}$  NMR spectrum of **6a** (Solvent:  $\text{CDCl}_3$ )

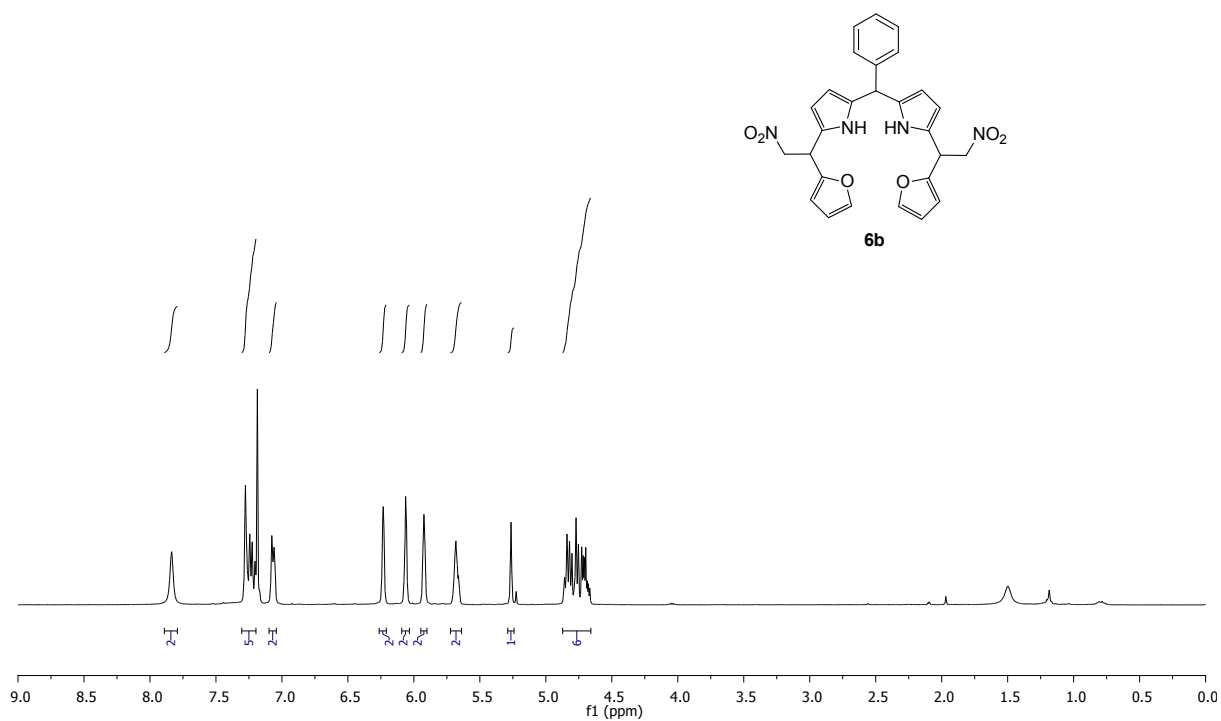

Figure S27. <sup>1</sup>H NMR spectrum of **6b** (Solvent: CDCl<sub>3</sub>)

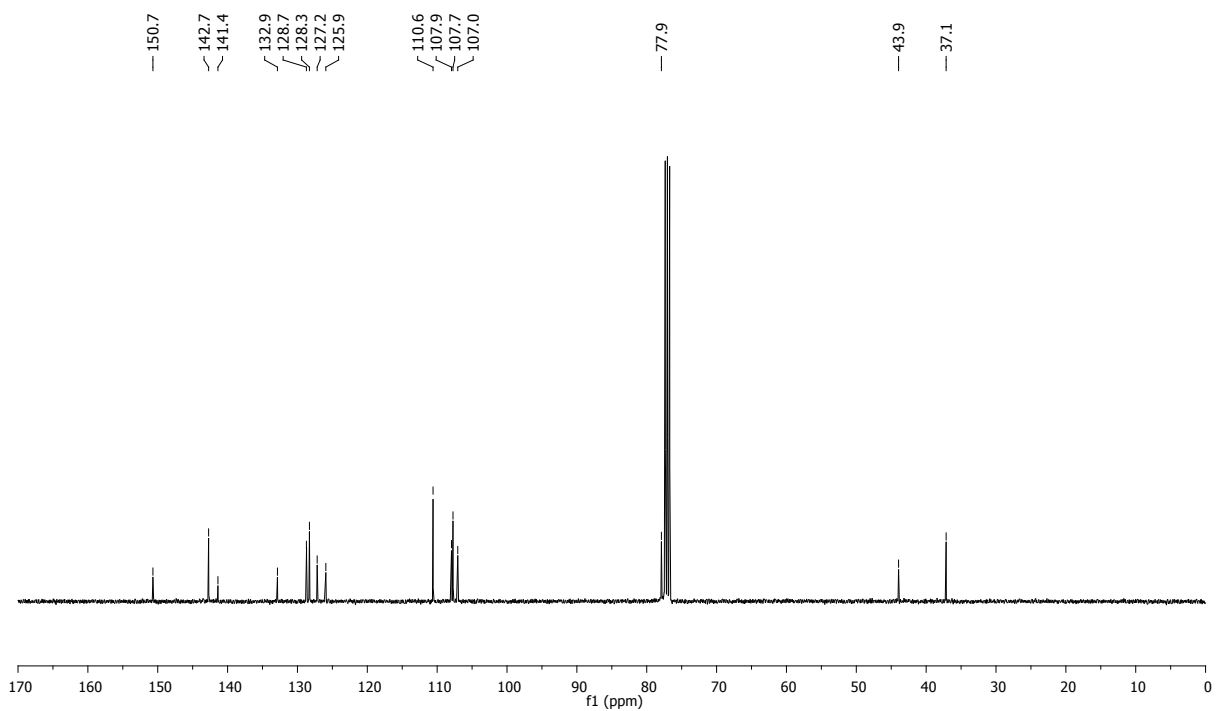

Figure S28. <sup>13</sup>C NMR spectrum of **6b** (Solvent: CDCl<sub>3</sub>)



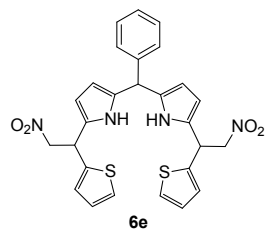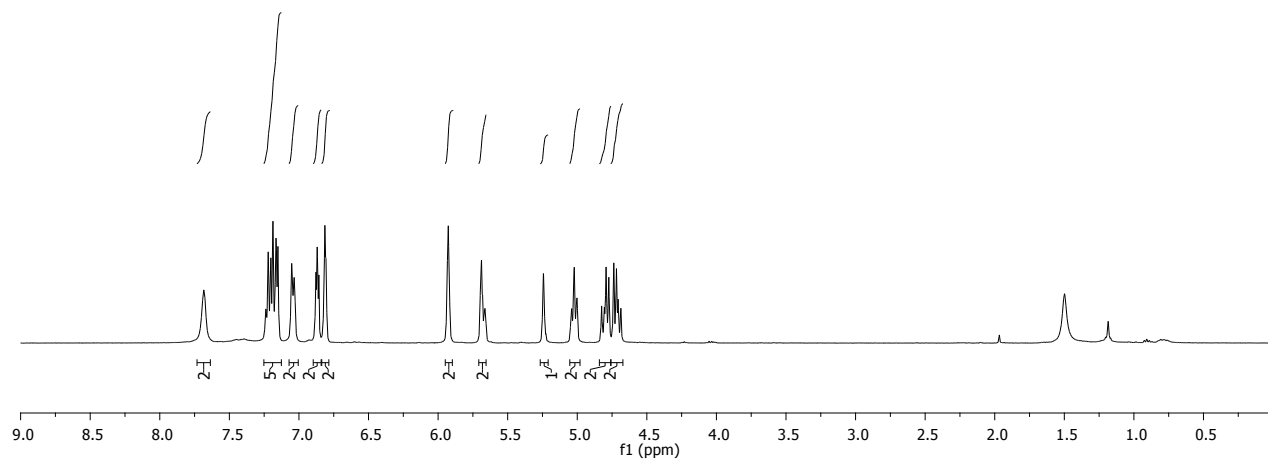

Figure S29. <sup>1</sup>H NMR spectrum of **6e** (Solvent: CDCl<sub>3</sub>)

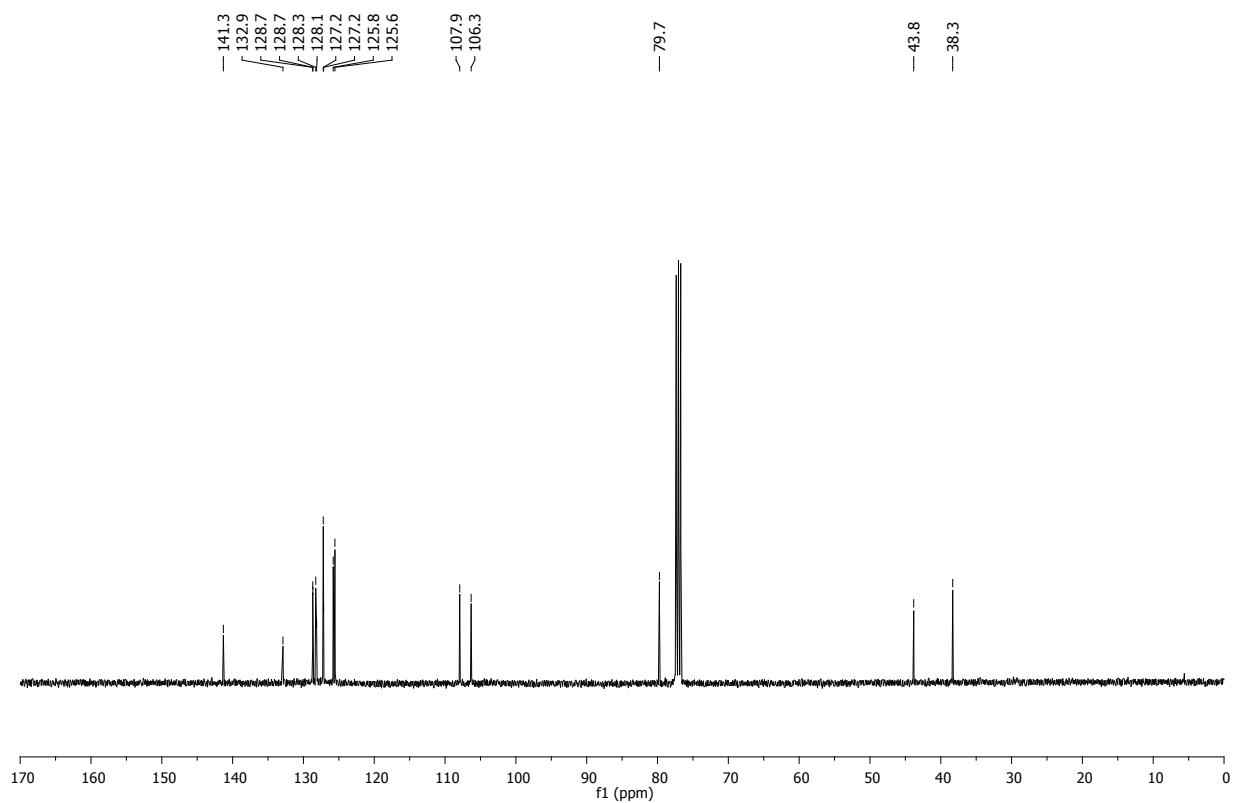

Figure S30.  $^{13}\text{C}$  NMR spectrum of **6e** (Solvent:  $\text{CDCl}_3$ )

### 3. NMR Spectra and Uv-visible spectra of compounds **7a-d**

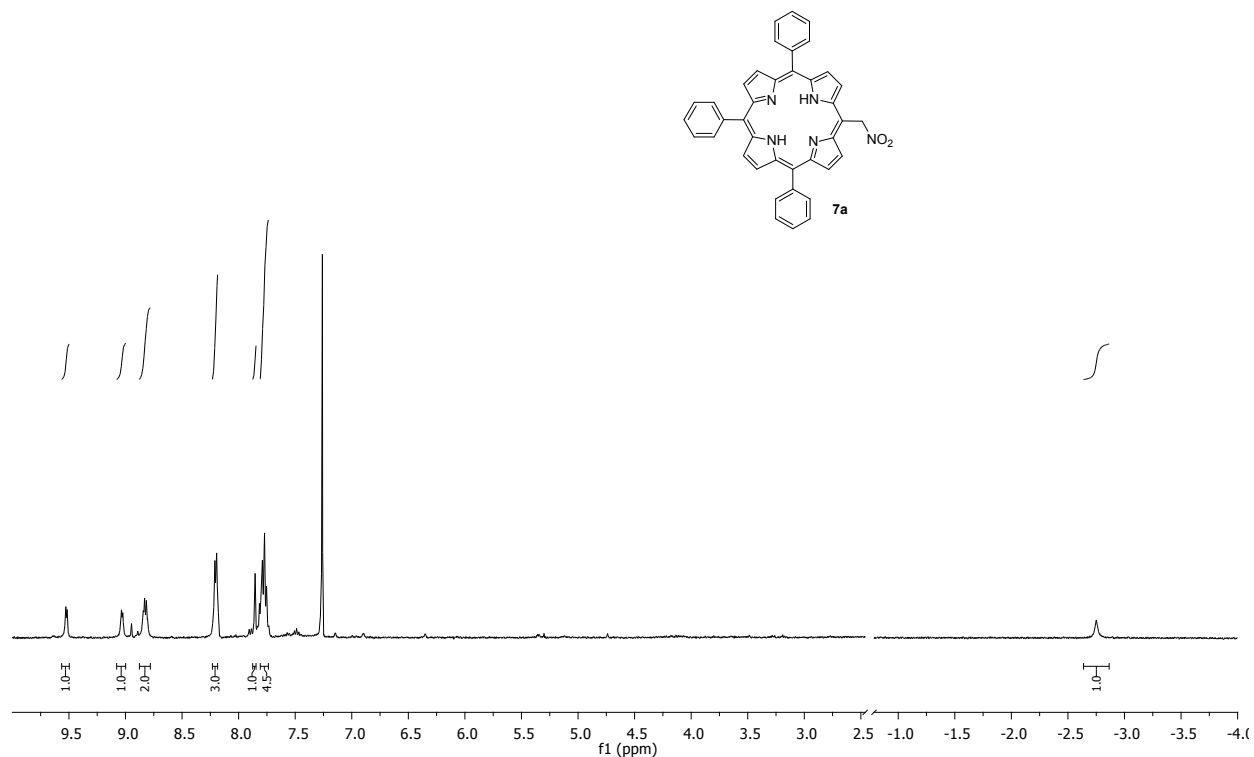

Figure S31.  $^1\text{H}$  NMR spectrum of **7a** (Solvent:  $\text{CDCl}_3$ )

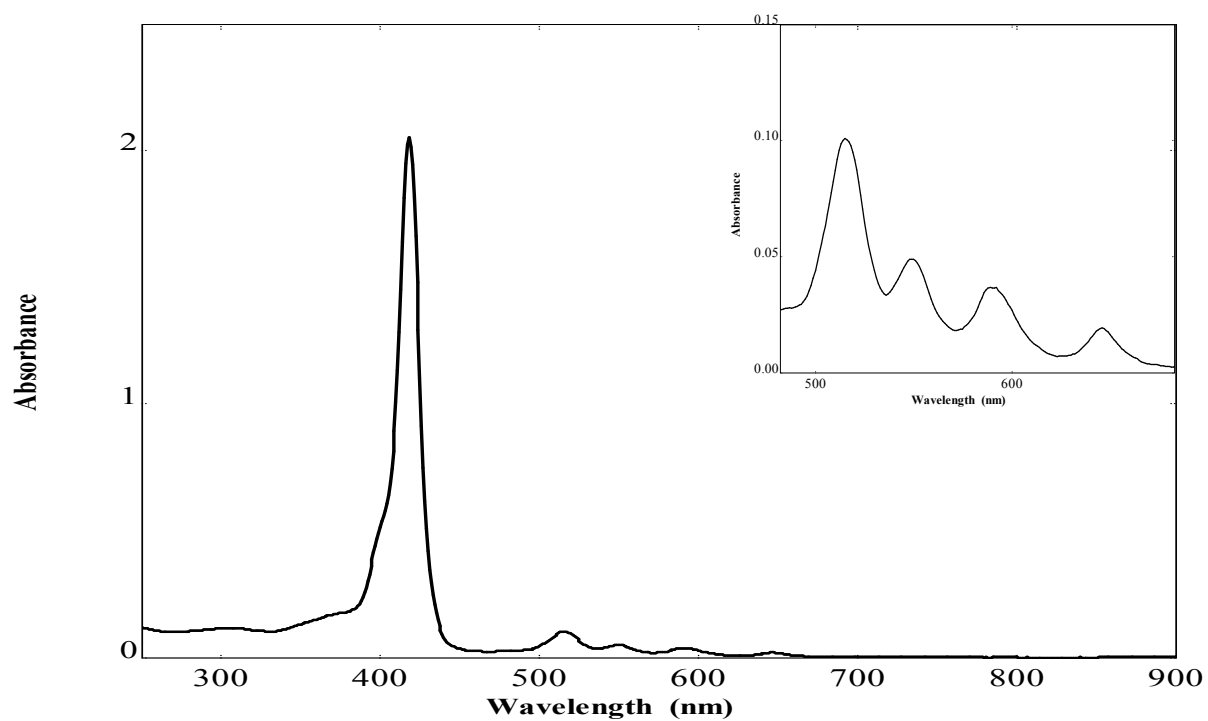

Figure S32. UV-vis spectrum of **7a** (Solvent: CH<sub>2</sub>Cl<sub>2</sub>)

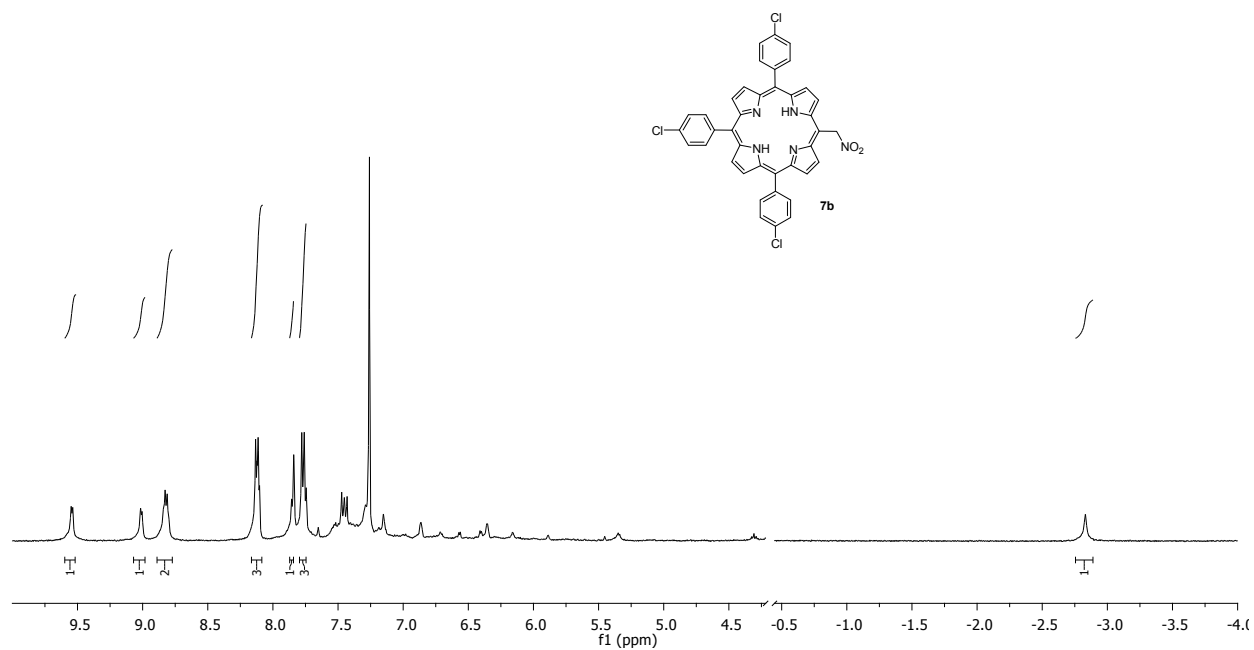

Figure S33. <sup>1</sup>H NMR spectrum of **7b** (Solvent: CDCl<sub>3</sub>)

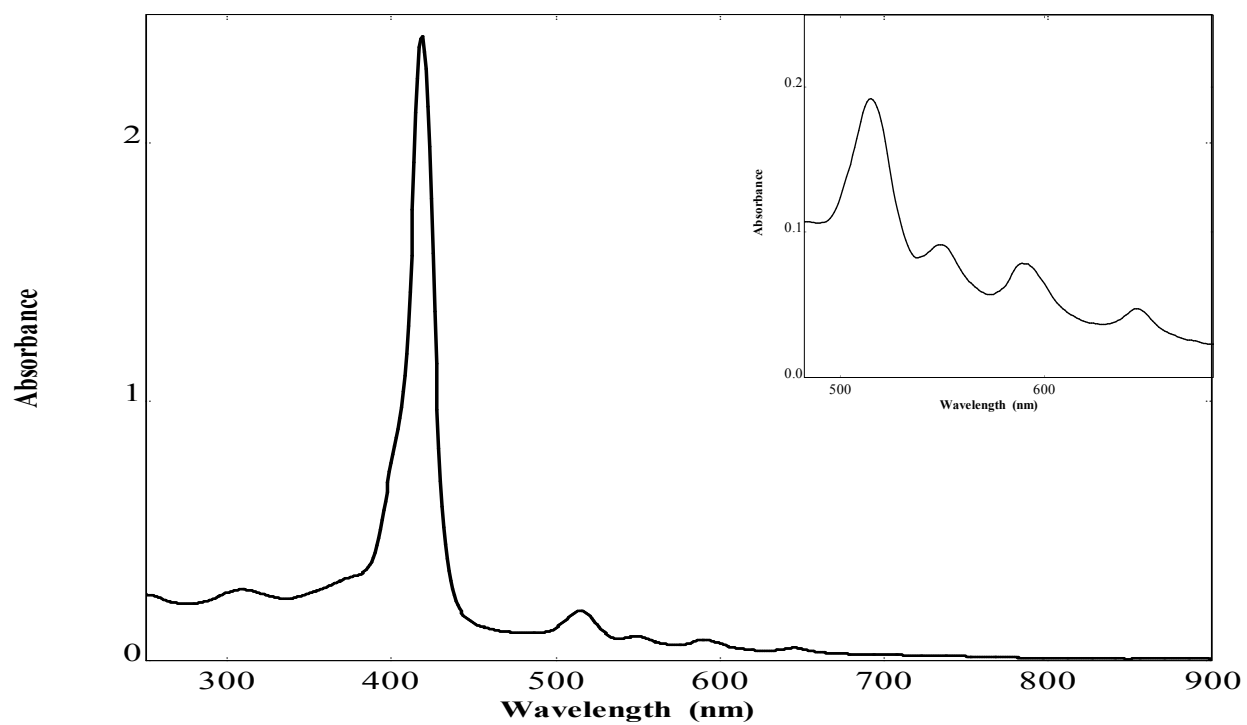

Figure S34. UV-vis spectrum of **7b** (Solvent: CH<sub>2</sub>Cl<sub>2</sub>)

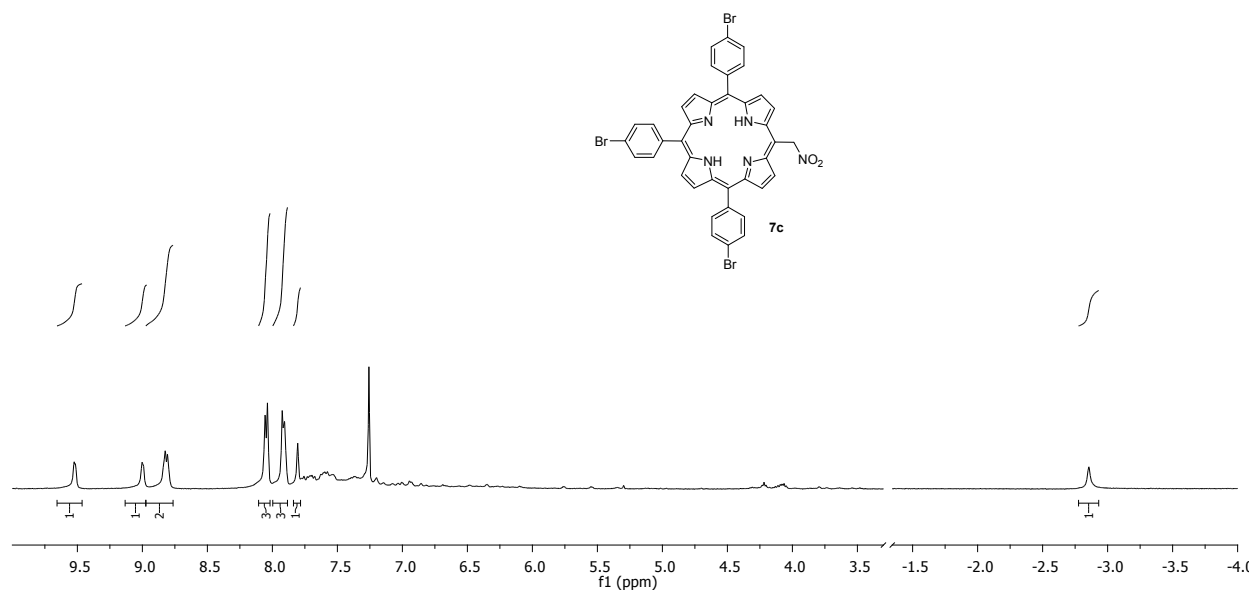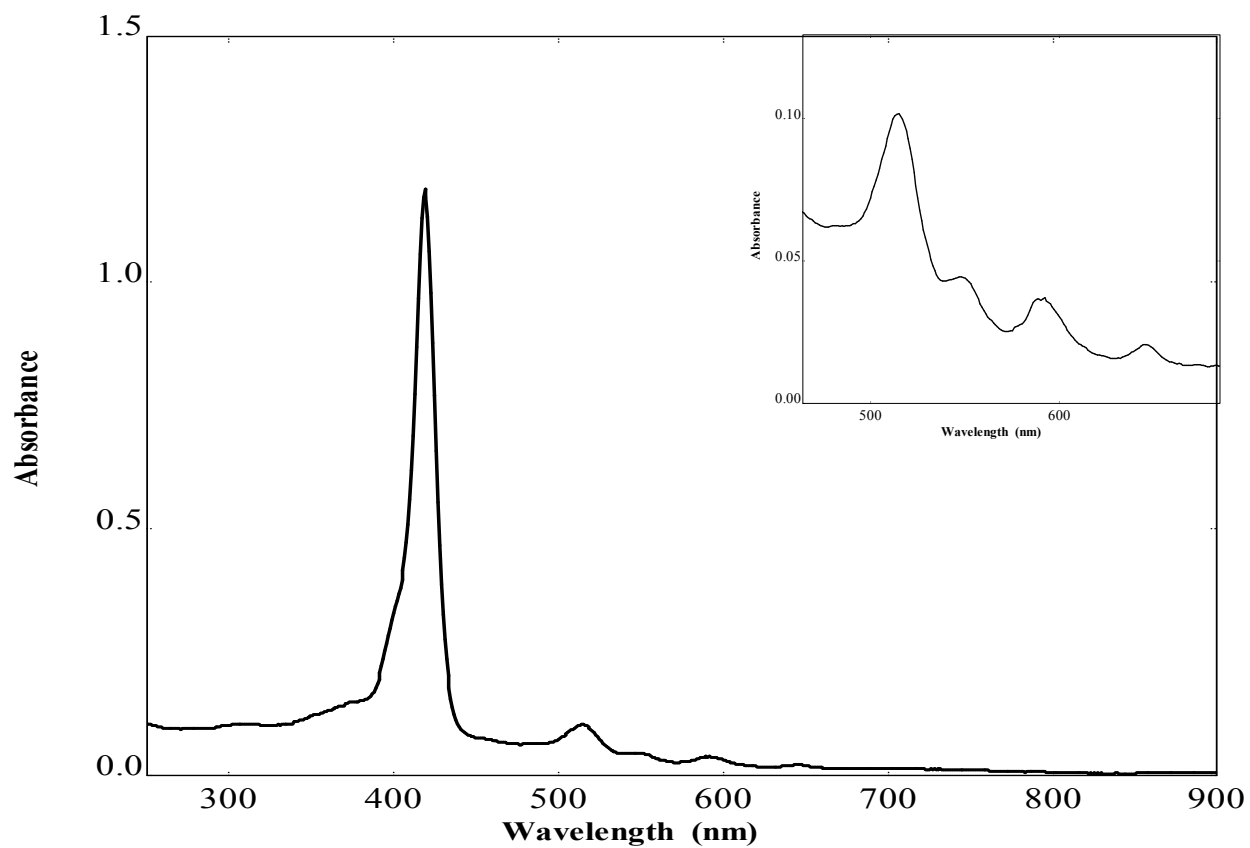

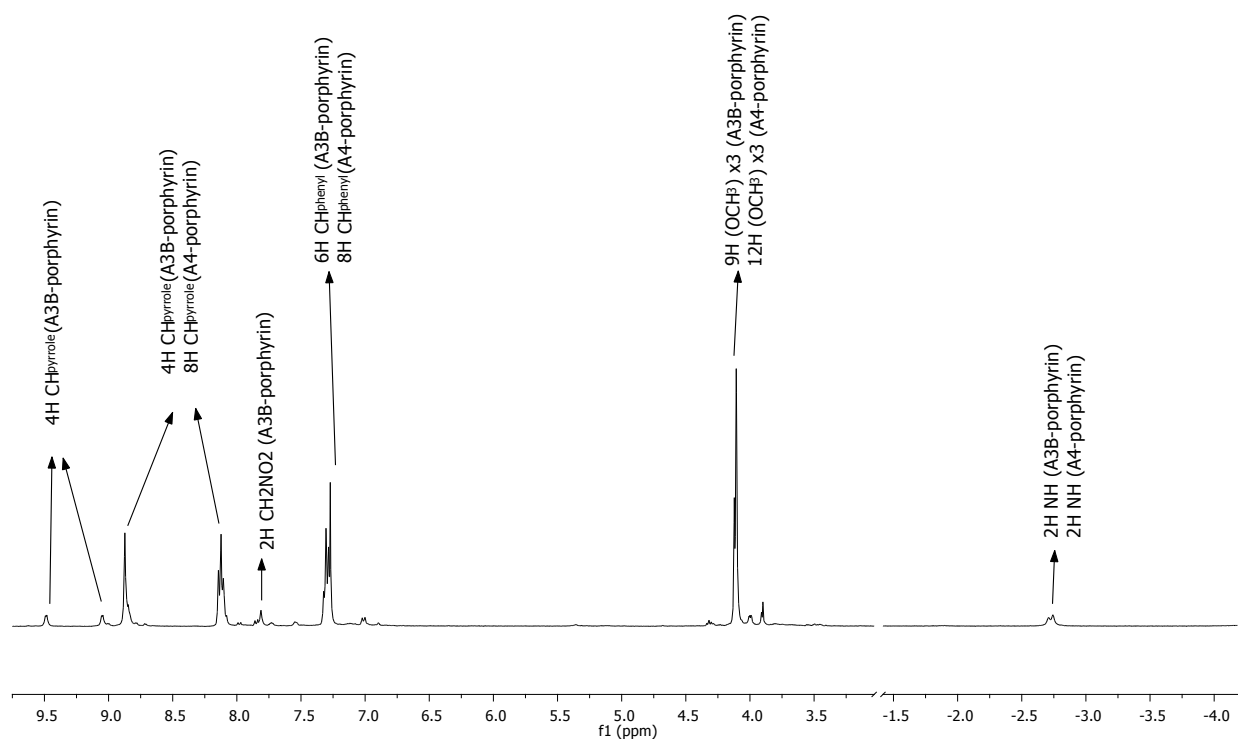

Figure S37. <sup>1</sup>H NMR spectrum of mixture **7d** with corresponding A<sub>4</sub> porphyrin (Solvent: CDCl<sub>3</sub>) (Solvent residual peaks at 0.5-2.5 ppm)
